# Supplementary material for: Rapid Characterization of Components in Bolbostemma paniculatum by UPLC/LTQ-Orbitrap MSn Analysis and Multivariate Statistical Analysis for Herb Discrimination
Source: PubMed Central journal article supplement (PMC6100040; doi:10.3390/molecules23051155), 2018-05-11
Supplement: molecules-23-01155-s001.pdf [file molecules-23-01155-s001.pdf]

**Table S1.** All the identified or tentatively identified components from *Bolbostemma paniculatum* extracts and their UPLC-MS<sup>n</sup> data.

| No. | t <sub>R</sub><br>(min) | Positive ESI mode           |                        |                                                                     | Negative ESI mode                                           |                        |                                                                                                           | Molecular<br>mass | Formula                                                       | Identification                                                               | Confidence<br>level of<br>identity <sup>a</sup> |
|-----|-------------------------|-----------------------------|------------------------|---------------------------------------------------------------------|-------------------------------------------------------------|------------------------|-----------------------------------------------------------------------------------------------------------|-------------------|---------------------------------------------------------------|------------------------------------------------------------------------------|-------------------------------------------------|
|     |                         | Adduct ions                 | Mass<br>error<br>(ppm) | MS <sup>n</sup> fragment ions                                       | Adduct ions                                                 | Mass<br>error<br>(ppm) | MS <sup>n</sup> fragment ions                                                                             |                   |                                                               |                                                                              |                                                 |
| 1   | 1.64                    | -                           | -                      | -                                                                   | 341.1092 [M-H] <sup>-</sup><br>683.2264 [2M-H] <sup>-</sup> | -0.68                  | MS <sup>2</sup> : 179(100)                                                                                | 342.1162          | C <sub>12</sub> H <sub>22</sub> O <sub>11</sub>               | sucrose                                                                      | III                                             |
| 2   | 1.73                    | 110.0602 [M+H] <sup>+</sup> | -0.72                  | MS <sup>2</sup> : 68(100)                                           | 108.0453 [M-H] <sup>-</sup>                                 | 1.73                   | MS <sup>2</sup> : 66(100)                                                                                 | 109.0528          | C <sub>6</sub> H <sub>7</sub> NO                              | 2-acetylpyrrole                                                              | III                                             |
| 3   | 1.91                    | 667.2277 [M+H] <sup>+</sup> | 2.15                   | -                                                                   | 665.2128 [M-H] <sup>-</sup>                                 | 2.68                   | MS <sup>2</sup> : 647(3.8), 503(12.7),<br>341(100) <sup>b</sup><br>MS <sup>3</sup> : 179(100)             | 666.2219          | C <sub>24</sub> H <sub>42</sub> O <sub>21</sub>               | stachyose                                                                    | III                                             |
| 4   | 2.25                    | 237.0966 [M+H] <sup>+</sup> | 1.31                   | -                                                                   | 235.0821 [M-H] <sup>-</sup>                                 | 1.02                   | MS <sup>2</sup> : 179(100)                                                                                | 236.0896          | C <sub>9</sub> H <sub>16</sub> O <sub>7</sub>                 | α-hydroxy acetone glucoside                                                  | III                                             |
| 5   | 2.45                    | 268.1042 [M+H] <sup>+</sup> | -0.63                  | -                                                                   | 266.0889 [M-H] <sup>-</sup>                                 | 2.18                   | MS <sup>2</sup> : 248(50.6), 238(100),<br>222(63.1), 134(33.8)                                            | 267.0968          | C <sub>10</sub> H <sub>13</sub> N <sub>5</sub> O <sub>4</sub> | adenosine (1) <sup>c</sup>                                                   | I                                               |
| 6   | 3.13                    | -                           | -                      | -                                                                   | 289.0725 [M-H] <sup>-</sup>                                 | -2.55                  | MS <sup>2</sup> : 179(100), 125(76.5),<br>109(39.8)                                                       | 290.0790          | C <sub>15</sub> H <sub>14</sub> O <sub>6</sub>                | catechin                                                                     | III                                             |
| 7   | 3.53                    | -                           | -                      | -                                                                   | 125.0243 [M-H] <sup>-</sup>                                 | 1.06                   | MS <sup>2</sup> : 81(100)                                                                                 | 126.0317          | C <sub>6</sub> H <sub>6</sub> O <sub>3</sub>                  | maltol                                                                       | III                                             |
| 8   | 4.18                    | 127.0393 [M+H] <sup>+</sup> | -2.59                  | -                                                                   | 125.0242 [M-H] <sup>-</sup>                                 | 1.74                   | MS <sup>2</sup> : 83(100)                                                                                 | 126.0317          | C <sub>6</sub> H <sub>6</sub> O <sub>3</sub>                  | pyrogallol                                                                   | III                                             |
| 9   | 4.21                    | -                           | -                      | -                                                                   | 235.1183 [M-H] <sup>-</sup>                                 | 1.55                   | MS <sup>2</sup> : 179(100)                                                                                | 236.1260          | C <sub>10</sub> H <sub>20</sub> O <sub>6</sub>                | n-butyl-β-D-fructopyranoside                                                 | III                                             |
| 10  | 4.39                    | -                           | -                      | -                                                                   | 353.0854 [M-H] <sup>-</sup><br>707.1791 [2M-H] <sup>-</sup> | -1.32                  | MS <sup>2</sup> : 335(100), 309(71.2),<br>191(86.3)<br>MS <sup>3</sup> : 173(100), 127(69.2),<br>85(23.9) | 354.0951          | C <sub>16</sub> H <sub>18</sub> O <sub>9</sub>                | chlorogenic acid (2)                                                         | I                                               |
| 11  | 4.43                    | 240.1235 [M+H] <sup>+</sup> | -1.94                  | MS <sup>2</sup> : 212(100), 140(30.1)<br>MS <sup>3</sup> : 112(100) | -                                                           | -                      | -                                                                                                         | 239.1158          | C <sub>12</sub> H <sub>17</sub> NO <sub>4</sub>               | 4-(2-formyl-5-methoxymethylpyrrol-1-yl)butyric acid methyl ester             | III                                             |
| 12  | 4.66                    | -                           | -                      | -                                                                   | 595.1292 [M-H] <sup>-</sup>                                 | 2.11                   | MS <sup>2</sup> : 433(100), 285(85.2)<br>MS <sup>3</sup> : 241(100), 161(25.4)                            | 596.1377          | C <sub>26</sub> H <sub>28</sub> O <sub>16</sub>               | 3-O-[[β-D-pyranranhose-(1-6)-β-D-galactopyranose]-5,7,4'-trihydroxyl flavone | III                                             |
| 13  | 4.74                    | 391.1002                    | -0.63                  | -                                                                   | 367.1035 [M-H] <sup>-</sup>                                 | -0.12                  | MS <sup>2</sup> : 353(85.6), 335(100),                                                                    | 368.1107          | C <sub>17</sub> H <sub>20</sub> O <sub>9</sub>                | 5-O-feruloylquinic acid                                                      | III                                             |

| No. | t <sub>R</sub><br>(min) | Positive ESI mode           |                        |                                                     | Negative ESI mode            |                        |                                                                                                       | Molecular<br>mass | Formula                                         | Identification                                    | Confidence<br>level of<br>identity <sup>a</sup> |
|-----|-------------------------|-----------------------------|------------------------|-----------------------------------------------------|------------------------------|------------------------|-------------------------------------------------------------------------------------------------------|-------------------|-------------------------------------------------|---------------------------------------------------|-------------------------------------------------|
|     |                         | Adduct ions                 | Mass<br>error<br>(ppm) | MS <sup>n</sup> fragment ions                       | Adduct ions                  | Mass<br>error<br>(ppm) | MS <sup>n</sup> fragment ions                                                                         |                   |                                                 |                                                   |                                                 |
|     |                         | [M+Na] <sup>+</sup>         |                        |                                                     |                              |                        | 317(38.5)                                                                                             |                   |                                                 |                                                   |                                                 |
|     |                         |                             |                        |                                                     |                              |                        | MS <sup>3</sup> : 179(100)                                                                            |                   |                                                 |                                                   |                                                 |
| 14  | 4.81                    | 449.1081 [M+H] <sup>+</sup> | -0.58                  | -                                                   | 447.0912 [M-H] <sup>-</sup>  | -0.97                  | MS <sup>2</sup> : 419(10.1), 327(24.8),<br>895.1896 [2M-H] <sup>-</sup>                               | 448.1006          | C <sub>21</sub> H <sub>20</sub> O <sub>11</sub> | quercitrin (3)                                    | I                                               |
|     |                         |                             |                        |                                                     |                              |                        | 301(44.5), 284(100),<br>257(8.81)                                                                     |                   |                                                 |                                                   |                                                 |
|     |                         |                             |                        |                                                     |                              |                        | MS <sup>3</sup> : 179(100), 151(81.2)                                                                 |                   |                                                 |                                                   |                                                 |
| 15  | 5.18                    | -                           | -                      | -                                                   | 191.0335 [M-H] <sup>-</sup>  | -0.41                  | MS <sup>2</sup> : 176(100)                                                                            | 192.0423          | C <sub>10</sub> H <sub>8</sub> O <sub>4</sub>   | scopoletin (4)                                    | I                                               |
|     |                         |                             |                        |                                                     |                              |                        | MS <sup>3</sup> : 148(100), 120(26.7),<br>104(15.2)                                                   |                   |                                                 |                                                   |                                                 |
| 16  | 5.22                    | -                           | -                      | -                                                   | 433.0765 [M-H] <sup>-</sup>  | 2.7                    | MS <sup>2</sup> : 313(54.5), 301(100),<br>182(11.8)                                                   | 434.0849          | C <sub>20</sub> H <sub>18</sub> O <sub>11</sub> | quercetin-3-O- $\alpha$ -L-<br>arabino pyranoside | III                                             |
|     |                         |                             |                        |                                                     |                              |                        | MS <sup>3</sup> : 273(100), 257(87.4),<br>193(41.3), 178(17.2),<br>165(10.3)                          |                   |                                                 |                                                   |                                                 |
| 17  | 5.53                    | 415.3940 [M+H] <sup>+</sup> | -1.34                  | MS <sup>2</sup> : 397(89.2), 273(100),<br>233(13.5) | -                            | -                      | -                                                                                                     | 414.3862          | C <sub>29</sub> H <sub>50</sub> O               | $\beta$ -sitosterol (5)                           | I                                               |
|     |                         |                             |                        | MS <sup>3</sup> : 255(100), 215(35.1)               |                              |                        |                                                                                                       |                   |                                                 |                                                   |                                                 |
| 18  | 5.77                    | -                           | -                      | -                                                   | 1333.6039 [M-H] <sup>-</sup> | 2.34                   | MS <sup>2</sup> : 1249(100),<br>1189(51.4), 797(86.1)                                                 | 1334.6143         | C <sub>63</sub> H <sub>98</sub> O <sub>30</sub> | tubeimoside II                                    | III                                             |
| 19  | 5.80                    | -                           | -                      | -                                                   | 785.4691 [M-H] <sup>-</sup>  | 1.17                   | MS <sup>2</sup> : 653(80.6), 635(100),<br>553(27.5), 535(35.2),<br>491(70.7), 391(67.8),<br>343(40.4) | 786.4766          | C <sub>41</sub> H <sub>70</sub> O <sub>14</sub> | tubeimoside IV                                    | III                                             |
| 20  | 5.80                    | 411.3610 [M+H] <sup>+</sup> | 2.78                   | MS <sup>2</sup> : 393(81.3), 271(100),<br>233(26.8) | -                            | -                      | -                                                                                                     | 410.3549          | C <sub>29</sub> H <sub>46</sub> O               | stigmasta-7,16,25-triene-3-ol                     | III                                             |
|     |                         |                             |                        | MS <sup>3</sup> : 253(100), 215(65.2)               |                              |                        |                                                                                                       |                   |                                                 |                                                   |                                                 |
| 21  | 5.82                    | 787.4815 [M+H] <sup>+</sup> | 2.96                   | -                                                   | 785.4689 [M-H] <sup>-</sup>  | 1.14                   | MS <sup>2</sup> : 653(80.6), 635(100),                                                                | 786.4766          | C <sub>41</sub> H <sub>70</sub> O <sub>14</sub> | actinostemmoside F                                | III                                             |

| No. | t <sub>R</sub><br>(min) | Positive ESI mode               |                        |                                                                                              | Negative ESI mode            |                        |                                                                                                       | Molecular<br>mass | Formula                                          | Identification                                                                                                              | Confidence<br>level of<br>identity <sup>a</sup> |
|-----|-------------------------|---------------------------------|------------------------|----------------------------------------------------------------------------------------------|------------------------------|------------------------|-------------------------------------------------------------------------------------------------------|-------------------|--------------------------------------------------|-----------------------------------------------------------------------------------------------------------------------------|-------------------------------------------------|
|     |                         | Adduct ions                     | Mass<br>error<br>(ppm) | MS <sup>n</sup> fragment ions                                                                | Adduct ions                  | Mass<br>error<br>(ppm) | MS <sup>n</sup> fragment ions                                                                         |                   |                                                  |                                                                                                                             |                                                 |
|     |                         |                                 |                        |                                                                                              |                              |                        | 553(27.5), 535(35.2),<br>491(70.7), 391(67.8),<br>343(40.4)                                           |                   |                                                  |                                                                                                                             |                                                 |
| 22  | 6.00                    | 787.4822 [M+H] <sup>+</sup>     | 2.07                   | -                                                                                            | 785.4689 [M-H] <sup>-</sup>  | 1.14                   | MS <sup>2</sup> : 653(80.6), 635(100),<br>553(27.5), 535(35.2),<br>491(70.7), 391(67.8),<br>343(40.4) | 786.4766          | C <sub>41</sub> H <sub>70</sub> O <sub>14</sub>  | 7β,18,20,26-tetrahydroxy-<br>(20S)-dammar-24E-en-3-O-<br>α-L-(3-<br>acetyl)arabino pyranosyl-(1<br>→2)-β-D-glucopyranoside  | III                                             |
| 23  | 6.05                    | 411.3614 [M+H] <sup>+</sup>     | 1.81                   | MS <sup>2</sup> : 393(100), 273(47.5),<br>233(40.1)<br>MS <sup>3</sup> : 255(100), 215(18.2) | -                            | -                      | -                                                                                                     | 410.3549          | C <sub>29</sub> H <sub>46</sub> O                | stigmasta-7,22,25-triene-3-ol                                                                                               | III                                             |
| 24  | 6.10                    | -                               | -                      | -                                                                                            | 827.4776 [M-H] <sup>-</sup>  | 2.71                   | MS <sup>2</sup> : 827(56.1), 679(100),<br>621(12.6) 473(87.2)<br>MS <sup>3</sup> : 455(100)           | 828.4871          | C <sub>43</sub> H <sub>72</sub> O <sub>15</sub>  | 7β,18,20,26-tetrahydroxy-<br>(20S)-dammar-24E-en-3-O-<br>α-L-arabino pyranosyl-(1→<br>2)-β-D-(6-acetyl)-<br>glucopyranoside | III                                             |
| 25  | 7.01                    | 1349.6392<br>[M+H] <sup>+</sup> | -1.49                  | -                                                                                            | 1347.6194 [M-H] <sup>-</sup> | 2.42                   | MS <sup>2</sup> : 1263(100)<br>MS <sup>3</sup> : 1221(93.6),<br>1203(100),<br>1131(18.1) 811(14.2)    | 1348.6299         | C <sub>64</sub> H <sub>100</sub> O <sub>30</sub> | lobatoside D                                                                                                                | III                                             |
| 26  | 7.26                    | -                               | -                      | -                                                                                            | 1363.6154 [M-H] <sup>-</sup> | -1.81                  | MS <sup>2</sup> : 1279(100),<br>1219(5.93),<br>1147(1.0), 1057(5.6),<br>827(9.63)                     | 1364.6249         | C <sub>64</sub> H <sub>100</sub> O <sub>31</sub> | tubeimoside III                                                                                                             | III                                             |
| 27  | 7.39                    | -                               | -                      | -                                                                                            | 1317.6083 [M-H] <sup>-</sup> | 2.88                   | MS <sup>2</sup> : 1233(100),<br>1173(47.3),<br>781(38.5), 649(11.3)                                   | 1318.6194         | C <sub>63</sub> H <sub>98</sub> O <sub>29</sub>  | tubeimoside I (6)                                                                                                           | I                                               |

| No. | tr<br>(min) | Positive ESI mode               |                        |                               | Negative ESI mode            |                        |                                                                                                                   | Molecular<br>mass | Formula                                          | Identification                                       | Confidence<br>level of<br>identity <sup>a</sup> |
|-----|-------------|---------------------------------|------------------------|-------------------------------|------------------------------|------------------------|-------------------------------------------------------------------------------------------------------------------|-------------------|--------------------------------------------------|------------------------------------------------------|-------------------------------------------------|
|     |             | Adduct ions                     | Mass<br>error<br>(ppm) | MS <sup>n</sup> fragment ions | Adduct ions                  | Mass<br>error<br>(ppm) | MS <sup>n</sup> fragment ions                                                                                     |                   |                                                  |                                                      |                                                 |
| 28  | 7.44        | 1217.5969                       | -1.06                  | -                             | 1215.5778 [M-H] <sup>-</sup> | 2.14                   | MS <sup>2</sup> : 1041(66.2),<br>749(100),<br>MS <sup>3</sup> : 587(100), 457(19.3)                               | 1216.5877         | C <sub>59</sub> H <sub>92</sub> O <sub>26</sub>  | lobatoside B                                         | III                                             |
| 29  | 7.51        | -                               | -                      | -                             | 1231.5735 [M-H] <sup>-</sup> | 1.48                   | MS <sup>2</sup> : 1189(7.9),<br>1159(13.6),<br>1147(100), 1105(5.6),<br>881(9.1), 821(17.0)                       | 1232.5826         | C <sub>59</sub> H <sub>92</sub> O <sub>27</sub>  | dexylosyltubeimoside III                             | III                                             |
| 30  | 7.52        | -                               | -                      | -                             | 1185.5667 [M-H] <sup>-</sup> | 2.65                   | MS <sup>2</sup> : 1101(100),<br>1059(14.3),<br>1041(10.1), 1023(1.2)                                              | 1186.5771         | C <sub>58</sub> H <sub>90</sub> O <sub>25</sub>  | lobatoside C                                         | III                                             |
| 31  | 7.67        | 1217.5915<br>[M+H] <sup>+</sup> | 2.84                   | -                             | 1215.5773 [M-H] <sup>-</sup> | 2.56                   | MS <sup>2</sup> : 1041(66.8), 749(100)<br>MS <sup>3</sup> : 587(100), 457(23.1)                                   | 1216.5877         | C <sub>59</sub> H <sub>92</sub> O <sub>26</sub>  | lobatoside G                                         | III                                             |
| 32  | 7.92        | -                               | -                      | -                             | 1347.6189 [M-H] <sup>-</sup> | 2.79                   | MS <sup>2</sup> : 1263(100)<br>MS <sup>3</sup> : 1221(93.6),<br>1203(100),<br>1131((18.1),<br>811(14.2)           | 1348.6299         | C <sub>64</sub> H <sub>100</sub> O <sub>30</sub> | tubeimoside V                                        | III                                             |
| 33  | 8.42        | 1379.6439<br>[M+H] <sup>+</sup> | 2.81                   | -                             | 1377.6297 [M-H] <sup>-</sup> | 2.56                   | MS <sup>2</sup> : 1217(100)<br>MS <sup>3</sup> : 895(100),<br>733(25.8), 455(17.2),<br>137(11.3)                  | 1378.6405         | C <sub>65</sub> H <sub>102</sub> O <sub>31</sub> | lobatoside F                                         | III                                             |
| 34  | 8.89        | 817.4951 [M+H] <sup>+</sup>     | -0.86                  | -                             | 815.4788 [M-H] <sup>-</sup>  | 1.88                   | MS <sup>2</sup> : 797(1.3) 769(100),<br>635(1.0), 559(1.6)<br>MS <sup>3</sup> : 701(33.2), 637(100),<br>619(32.8) | 816.4871          | C <sub>42</sub> H <sub>72</sub> O <sub>15</sub>  | actinostemmoside H                                   | III                                             |
| 35  | 9.71        | 771.4891 [M+H] <sup>+</sup>     | -0.23                  | -                             | 769.4722 [M-H] <sup>-</sup>  | 2.81                   | MS <sup>2</sup> : 637(62.2), 619(100),<br>589(7.4), 571(9.3),                                                     | 770.4816          | C <sub>41</sub> H <sub>70</sub> O <sub>13</sub>  | 7β,20,26-trihydroxy-(20S)-<br>dammar-24E-en-3-O-α-L- | III                                             |

| No. | t <sub>R</sub><br>(min) | Positive ESI mode           |                        |                                                                                                                                     | Negative ESI mode                                            |                        |                                                                                                                       | Molecular<br>mass | Formula                                         | Identification                                                                                          | Confidence<br>level of<br>identity <sup>a</sup> |
|-----|-------------------------|-----------------------------|------------------------|-------------------------------------------------------------------------------------------------------------------------------------|--------------------------------------------------------------|------------------------|-----------------------------------------------------------------------------------------------------------------------|-------------------|-------------------------------------------------|---------------------------------------------------------------------------------------------------------|-------------------------------------------------|
|     |                         | Adduct ions                 | Mass<br>error<br>(ppm) | MS <sup>n</sup> fragment ions                                                                                                       | Adduct ions                                                  | Mass<br>error<br>(ppm) | MS <sup>n</sup> fragment ions                                                                                         |                   |                                                 |                                                                                                         |                                                 |
|     |                         |                             |                        |                                                                                                                                     |                                                              |                        | 475(67.9), 427(8.0),<br>343(24.4)                                                                                     |                   |                                                 | arabino pyranosyl-(1 → 2)-β-D-glucopyranoside                                                           |                                                 |
| 36  | 9.76                    | -                           | -                      | -                                                                                                                                   | 781.4365 [M-H] <sup>-</sup>                                  | 1.89                   | MS <sup>2</sup> : 649 469                                                                                             | 782.4453          | C <sub>41</sub> H <sub>66</sub> O <sub>14</sub> | lobatoside A                                                                                            | III                                             |
| 37  | 10.87                   | -                           | -                      | -                                                                                                                                   | 811.4829 [M-H] <sup>-</sup><br>1623.9679 [2M-H] <sup>-</sup> | 2.50                   | MS <sup>2</sup> : 769(100), 751(4.6)<br>619(11.2), 571(6.7)                                                           | 812.4922          | C <sub>43</sub> H <sub>72</sub> O <sub>14</sub> | 7β,20,26-trihydroxy-(20S)-dammar-24E-en-3-O-α-L-(3-acetyl)arabino pyranosyl-(1 → 2)-β-D-glucopyranoside | III                                             |
| 38  | 11.68                   | -                           | -                      | -                                                                                                                                   | 799.4831 [M-H] <sup>-</sup>                                  | 2.29                   | MS <sup>2</sup> : 637(33.7), 475(100),<br>457(14.7)<br>MS <sup>3</sup> : 439(100)                                     | 800.4922          | C <sub>42</sub> H <sub>72</sub> O <sub>14</sub> | ac tinostemmoside E                                                                                     | III                                             |
| 39  | 13.19                   | 271.0589 [M+H] <sup>+</sup> | -1.230                 | -                                                                                                                                   | 269.0457 [M-H] <sup>-</sup>                                  | 0.77                   | MS <sup>2</sup> : 241(32.2), 225(100),<br>197(3.98)                                                                   | 270.0528          | C <sub>15</sub> H <sub>10</sub> O <sub>5</sub>  | emodin (7)                                                                                              | I                                               |
| 40  | 13.67                   | -                           | -                      | -                                                                                                                                   | 559.3260 [M-H] <sup>-</sup>                                  | 2.94                   | MS <sup>2</sup> : 541(26.9), 499(38.9),<br>481(100)<br>MS <sup>3</sup> : 463(46.3), 439(27.0),<br>301(100), 283(24.5) | 560.3349          | C <sub>32</sub> H <sub>48</sub> O <sub>8</sub>  | 23,24-dihydroisocucurbitacin B                                                                          | III                                             |
| 41  | 13.76                   | 285.0746 [M+H] <sup>+</sup> | -0.92                  |                                                                                                                                     | 283.0605 [M-H] <sup>-</sup>                                  | 2.43                   | MS <sup>2</sup> : 269 241 225 197                                                                                     | 284.0685          | C <sub>16</sub> H <sub>12</sub> O <sub>5</sub>  | emodinmonomethylether                                                                                   | III                                             |
| 42  | 14.48                   | -                           | -                      | -                                                                                                                                   | 559.3266 [M-H] <sup>-</sup>                                  | 1.86                   | MS <sup>2</sup> : 541(26.9), 499(38.9),<br>481(100)<br>MS <sup>3</sup> : 463(46.3), 439(27.0),<br>301(100), 283(24.5) | 560.3349          | C <sub>32</sub> H <sub>48</sub> O <sub>8</sub>  | cucurbitacin E                                                                                          | III                                             |
| 43  | 15.03                   | 699.3602 [M+H] <sup>+</sup> | -1.43                  | MS <sup>2</sup> : 615(54.2), 575(15.6),<br>521(100), 437(34.8),<br>397(19.7)<br>MS <sup>3</sup> : 357(100), 273(21.5),<br>233(17.6) | 697.3450 [M-H] <sup>-</sup>                                  | -1.32                  | -                                                                                                                     | 698.3514          | C <sub>35</sub> H <sub>54</sub> O <sub>14</sub> | uzarigenin-3-β-sophoroside                                                                              | III                                             |
| 44  | 15.27                   | 581.3100                    | -2.60                  | -                                                                                                                                   | 557.3102 [M-H] <sup>-</sup>                                  | 2.85                   | MS <sup>2</sup> : 539(100), 515(30.8),                                                                                | 558.3193          | C <sub>32</sub> H <sub>46</sub> O <sub>8</sub>  | cucurbitacin B (8)                                                                                      | I                                               |

| No. | t <sub>R</sub><br>(min) | Positive ESI mode           |                        |                                                                                                                                                           | Negative ESI mode            |                        |                                                                                                 | Molecular<br>mass | Formula                                         | Identification                                                                                                                                              | Confidence<br>level of<br>identity <sup>a</sup> |
|-----|-------------------------|-----------------------------|------------------------|-----------------------------------------------------------------------------------------------------------------------------------------------------------|------------------------------|------------------------|-------------------------------------------------------------------------------------------------|-------------------|-------------------------------------------------|-------------------------------------------------------------------------------------------------------------------------------------------------------------|-------------------------------------------------|
|     |                         | Adduct ions                 | Mass<br>error<br>(ppm) | MS <sup>n</sup> fragment ions                                                                                                                             | Adduct ions                  | Mass<br>error<br>(ppm) | MS <sup>n</sup> fragment ions                                                                   |                   |                                                 |                                                                                                                                                             |                                                 |
|     |                         | [M+Na] <sup>+</sup>         |                        |                                                                                                                                                           |                              |                        | 497(90.1) 479(10.2)                                                                             |                   |                                                 |                                                                                                                                                             |                                                 |
| 45  | 16.57                   | 701.3750 [M+H] <sup>+</sup> | -0.67                  | MS <sup>2</sup> : 701(51.2), 683(89.3),<br>523(100), 335(35.9),<br>317(24.6), 277(12.3)<br>MS <sup>3</sup> : 665(100), 487(32.6),<br>299(33.7), 259(19.4) | 699.3602 [M-H] <sup>-</sup>  | -0.67                  | -                                                                                               | 700.3670          | C <sub>35</sub> H <sub>56</sub> O <sub>14</sub> | sileneoside H                                                                                                                                               | III                                             |
| 46  | 16.94                   | 577.4455 [M+H] <sup>+</sup> | 1.33                   | MS <sup>2</sup> : 435(63.5), 397(100),<br>MS <sup>3</sup> : 255(100), 215(29.7)                                                                           | 575.4308 [M-H] <sup>-</sup>  | 1.59                   | -                                                                                               | 576.4390          | C <sub>35</sub> H <sub>60</sub> O <sub>6</sub>  | daucosterol                                                                                                                                                 | III                                             |
| 47  | 17.56                   | 537.3066 [M+H] <sup>+</sup> | -0.75                  | MS <sup>2</sup> : 453(56.3), 413(33.2),<br>395(21.4), 373(100)<br>MS <sup>3</sup> : 289(100), 249(45.8),<br>231(39.7)                                     | 535.2900 [M-H] <sup>-</sup>  | 2.35                   | -                                                                                               | 536.2985          | C <sub>29</sub> H <sub>44</sub> O <sub>9</sub>  | frugoside                                                                                                                                                   | III                                             |
| 48  | 17.96                   | 573.4139 [M+H] <sup>+</sup> | 1.86                   | MS <sup>2</sup> : 435(100), 393(86.3)<br>MS <sup>3</sup> : 255(100), 215(37.2)                                                                            | 571.3995 [M-H] <sup>-</sup>  | 1.60                   | -                                                                                               | 572.4077          | C <sub>35</sub> H <sub>56</sub> O <sub>6</sub>  | stigmasta-7,22,25-triene-3-O-<br>β-D-glucopyranoside                                                                                                        | III                                             |
| 49  | 18.77                   | -                           | -                      | -                                                                                                                                                         | 1191.5806 [M-H] <sup>-</sup> | 0.77                   | MS <sup>2</sup> : 1059(71.4),<br>897(36.7), 765(15.1)<br>487(100)<br>MS <sup>3</sup> : 469(100) | 1192.5877         | C <sub>57</sub> H <sub>92</sub> O <sub>26</sub> | 3-O-α-L-arabinopyranosyl(1<br>→2)-β-D-glucopyranosyl-<br>bayogenin-28-O-β-D-<br>xylopyranosyl(1 →3)-α-L-<br>rhamnopyranosyl(1 →2)-α-<br>L-arabinopyranoside | III                                             |
| 50  | 19.32                   | 539.3218 [M+H] <sup>+</sup> | -0.10                  | MS <sup>2</sup> : 521(93.1), 335(100),<br>295(25.9), 277(63.3)<br>MS <sup>3</sup> : 503(100), 285(72.3),<br>245(61.3), 227(27.1)                          | 537.3055 [M-H] <sup>-</sup>  | 2.62                   | -                                                                                               | 538.3142          | C <sub>29</sub> H <sub>46</sub> O <sub>9</sub>  | integristerone A-25-acetate                                                                                                                                 | III                                             |
| 51  | 19.96                   | 493.3160 [M+H] <sup>+</sup> | 0.48                   | MS <sup>2</sup> : 475(100), 319(89.8),<br>279(54.7), 261(39.1)<br>MS <sup>3</sup> : 457(100), 269(39.3),                                                  | -                            | -                      | -                                                                                               | 492.3087          | C <sub>28</sub> H <sub>44</sub> O <sub>7</sub>  | 24(28)-dehydromakisterone<br>A                                                                                                                              | III                                             |

| No. | t <sub>R</sub><br>(min) | Positive ESI mode                                              |                        |                                                                                                      | Negative ESI mode           |                        |                               | Molecular<br>mass | Formula                                         | Identification                                                             | Confidence<br>level of<br>identity <sup>a</sup> |
|-----|-------------------------|----------------------------------------------------------------|------------------------|------------------------------------------------------------------------------------------------------|-----------------------------|------------------------|-------------------------------|-------------------|-------------------------------------------------|----------------------------------------------------------------------------|-------------------------------------------------|
|     |                         | Adduct ions                                                    | Mass<br>error<br>(ppm) | MS <sup>n</sup> fragment ions                                                                        | Adduct ions                 | Mass<br>error<br>(ppm) | MS <sup>n</sup> fragment ions |                   |                                                 |                                                                            |                                                 |
| 52  | 20.99                   | 279.1595 [M+H] <sup>+</sup>                                    | -1.24                  | 229(38.4), 211(15.2)<br>MS <sup>2</sup> : 279(100), 223(59.8),<br>167(65.3)                          | -                           | -                      | -                             | 278.1518          | C <sub>16</sub> H <sub>22</sub> O <sub>4</sub>  | di-butyl phthalate                                                         | III                                             |
| 53  | 22.96                   | 653.6215 [M+H] <sup>+</sup>                                    | 2.46                   | MS <sup>2</sup> : 511(78.2), <b>397</b> (100)<br>MS <sup>3</sup> : 255(100), 215(67.2)               | -                           | -                      | -                             | 652.6158          | C <sub>45</sub> H <sub>80</sub> O <sub>2</sub>  | β-sitosterol palmitate                                                     | III                                             |
| 54  | 23.67                   | 811.6425 [M+H] <sup>+</sup>                                    | 2.63                   | MS <sup>2</sup> : 573(100), 435(56.1),<br><b>393</b> (79.2)<br>MS <sup>3</sup> : 255(100), 215(63.7) | 809.6290 [M-H] <sup>-</sup> | 1.33                   | -                             | 810.6374          | C <sub>51</sub> H <sub>86</sub> O <sub>7</sub>  | stigmasta-7,22,25-triene-3-O-<br>β-D-(6'-palmitoyl)<br>glucopyranoside     | III                                             |
| 55  | 24.24                   | 691.6377 [M+H] <sup>+</sup>                                    | 1.53                   | MS <sup>2</sup> : 553(59.9), <b>393</b> (100)<br>MS <sup>3</sup> : 255(100), 215(55.4)               | -                           | -                      | -                             | 690.6315          | C <sub>48</sub> H <sub>82</sub> O <sub>2</sub>  | stigmasta-7,22,25-triene-3-O-<br>nonadecanoic acid ester                   | III                                             |
| 56  | 24.91                   | 282.2799 [M+H] <sup>+</sup><br>563.5530<br>[2M+H] <sup>+</sup> | -2.69                  | MS <sup>2</sup> : 237(100)                                                                           | 280.2640 [M-H] <sup>-</sup> | 2.10                   | -                             | 281.2719          | C <sub>18</sub> H <sub>35</sub> NO              | 9-octadecenamide                                                           | III                                             |
| 57  | 25.25                   | 314.1379 [M+H] <sup>+</sup>                                    | 2.50                   | -                                                                                                    | 312.1249 [M-H] <sup>-</sup> | -2.46                  | MS <sup>2</sup> : 193 136     | 313.1314          | C <sub>18</sub> H <sub>19</sub> NO <sub>4</sub> | (E)-N-hydroxy phenylethyl-<br>3-(4-hydroxy-3-methoxy<br>phenyl) acrylamide | III                                             |
| 58  | 26.51                   | -                                                              | -                      | -                                                                                                    | 255.2328 [M-H] <sup>-</sup> | 0.66                   | MS <sup>2</sup> : 209(100)    | 256.2402          | C <sub>16</sub> H <sub>32</sub> O <sub>2</sub>  | hexadecanoic acid                                                          | III                                             |
| 59  | 27.17                   | 595.3974<br>[M+Na] <sup>+</sup>                                | -0.91                  | MS <sup>2</sup> : 435(70.8), 395(100),<br><b>393</b> (94.2)<br>MS <sup>3</sup> : 255(100), 215(36.9) | -                           | -                      | -                             | 572.4077          | C <sub>35</sub> H <sub>56</sub> O <sub>6</sub>  | (3β,22E)-stigmasta-7,22,25-<br>trien-3-yl-β-D-<br>glucopyranoside          | III                                             |
| 60  | 27.62                   | 327.1958 [M+H] <sup>+</sup>                                    | -1.01                  | MS <sup>2</sup> : 255(100)<br>MS <sup>3</sup> : 215(100)                                             | 325.1818 [M-H] <sup>-</sup> | -2.66                  | -                             | 326.1882          | C <sub>21</sub> H <sub>26</sub> O <sub>3</sub>  | 3-oxo-androsta-1,4-dien-<br>17a'-spiro-2'-3'-oxo-oxetane                   | III                                             |

<sup>a)</sup> The confidence level of identity of all the identified components were determined following the four levels defined by the Metabolomics Standards Initiative. Level I : confidently identified compounds; Level II : Putatively annotated compounds; Level III: putatively annotated compound classes; Level IV: unknown compounds.

<sup>b)</sup> The bold m/z values and bracketed relative peak intensities showed the targeted MS<sup>2</sup> fragment ions for further MS<sup>3</sup> fragmentation.

<sup>c)</sup> The bracketed bold figures showed the serial number of corresponding reference compounds.

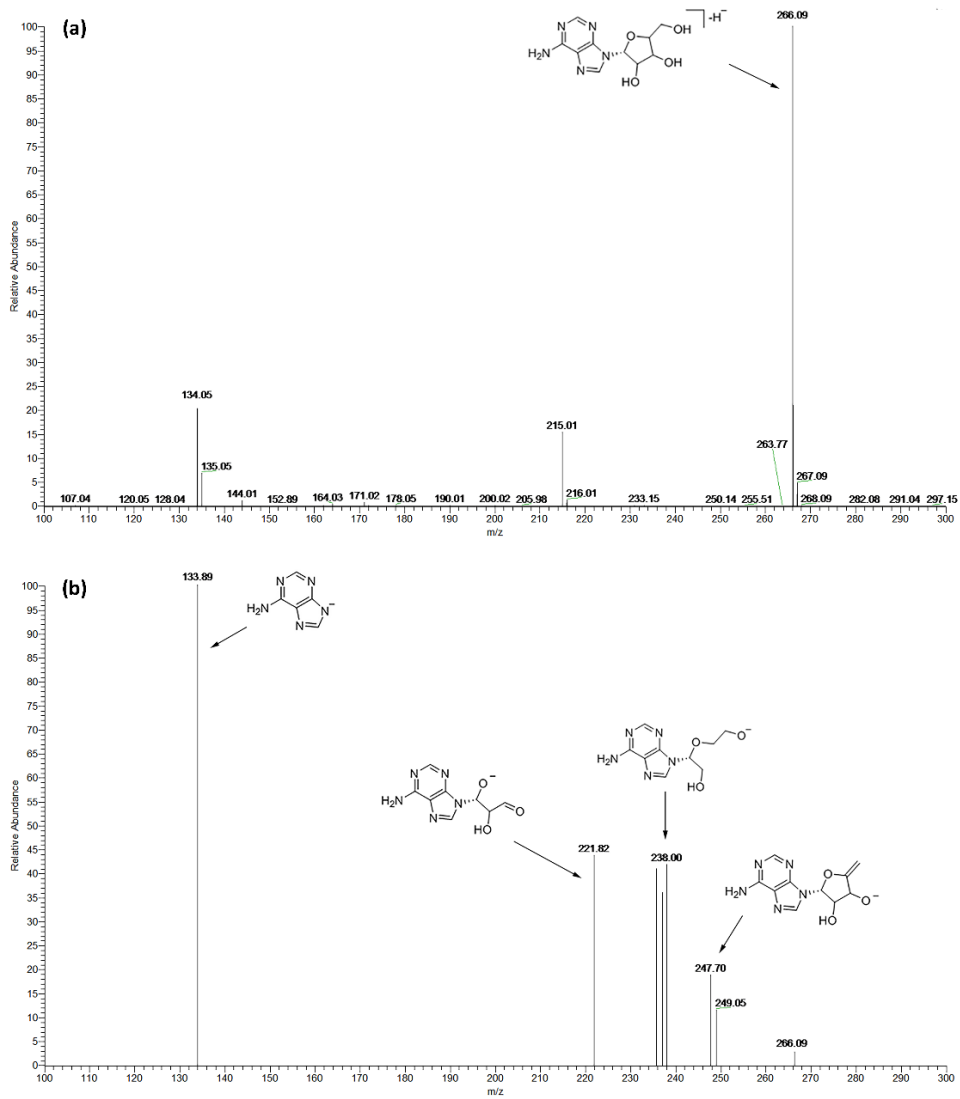

**Figure S1.** MS<sup>n</sup> spectra and proposed fragment ions of adenosine (**1**) in negative ion mode: **(a)** MS spectrum; **(b)** MS<sup>2</sup> spectrum (precursor ion was m/z 266).



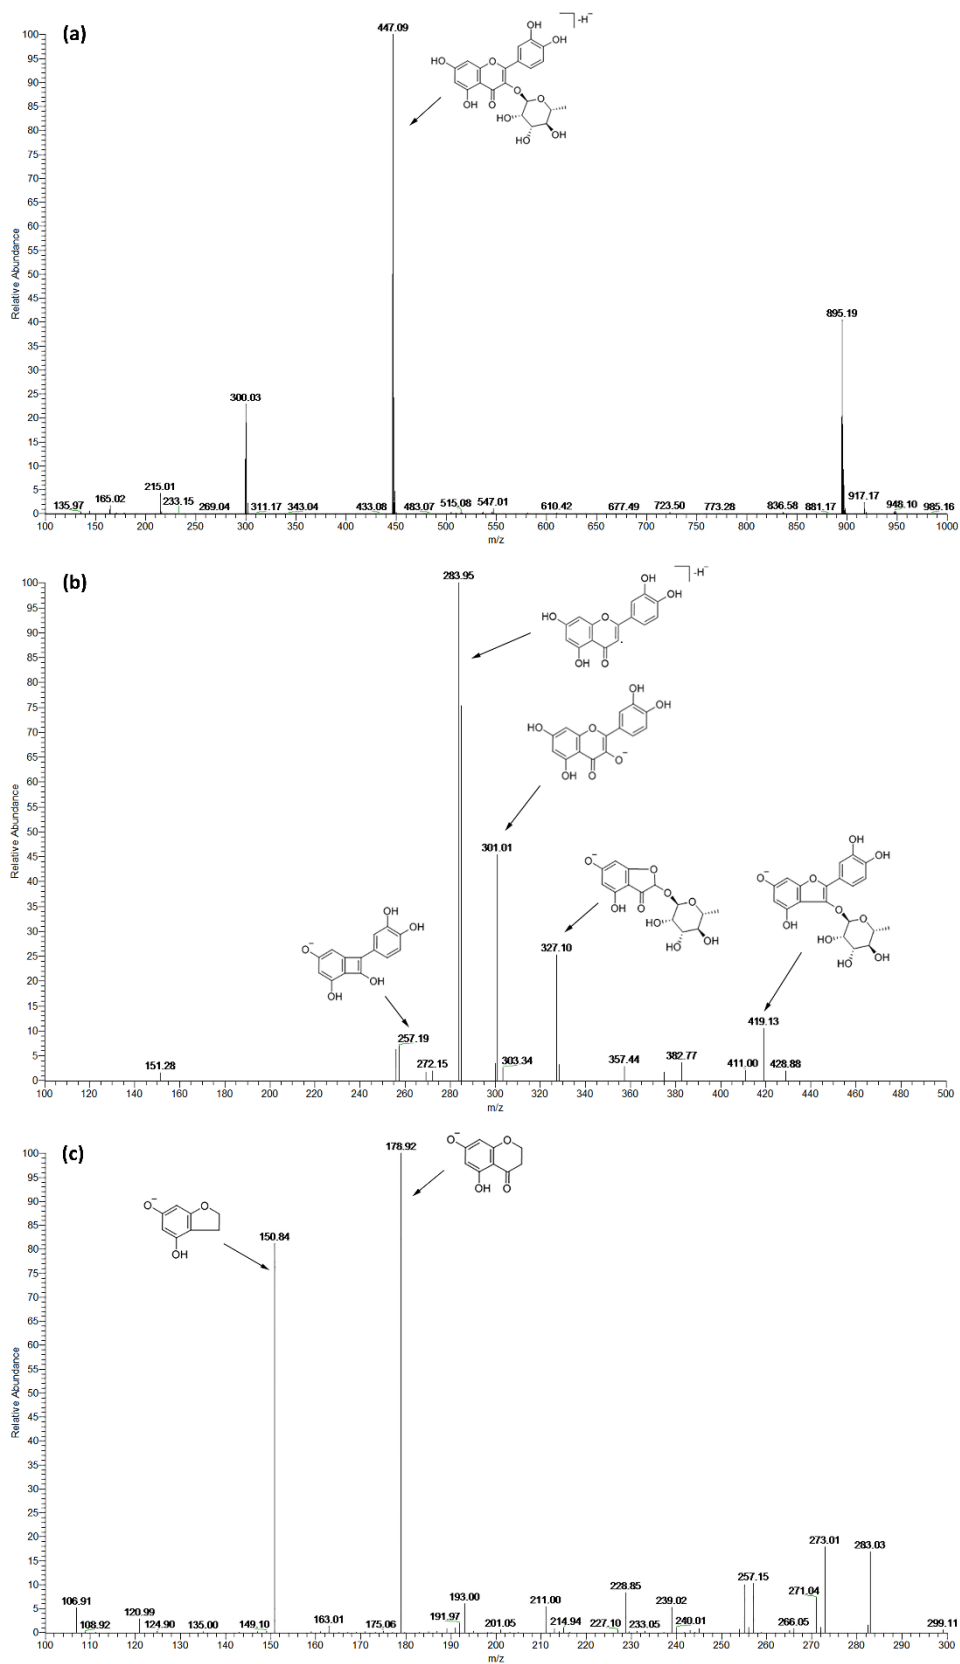

**Figure S2.** MS<sup>n</sup> spectra and proposed fragment ions of quercitrin (3) in negative ion mode: (a) MS spectrum; (b) MS<sup>2</sup> spectrum (precursor ion was m/z 447); (c) MS<sup>3</sup> spectrum (precursor ion was m/z 301).

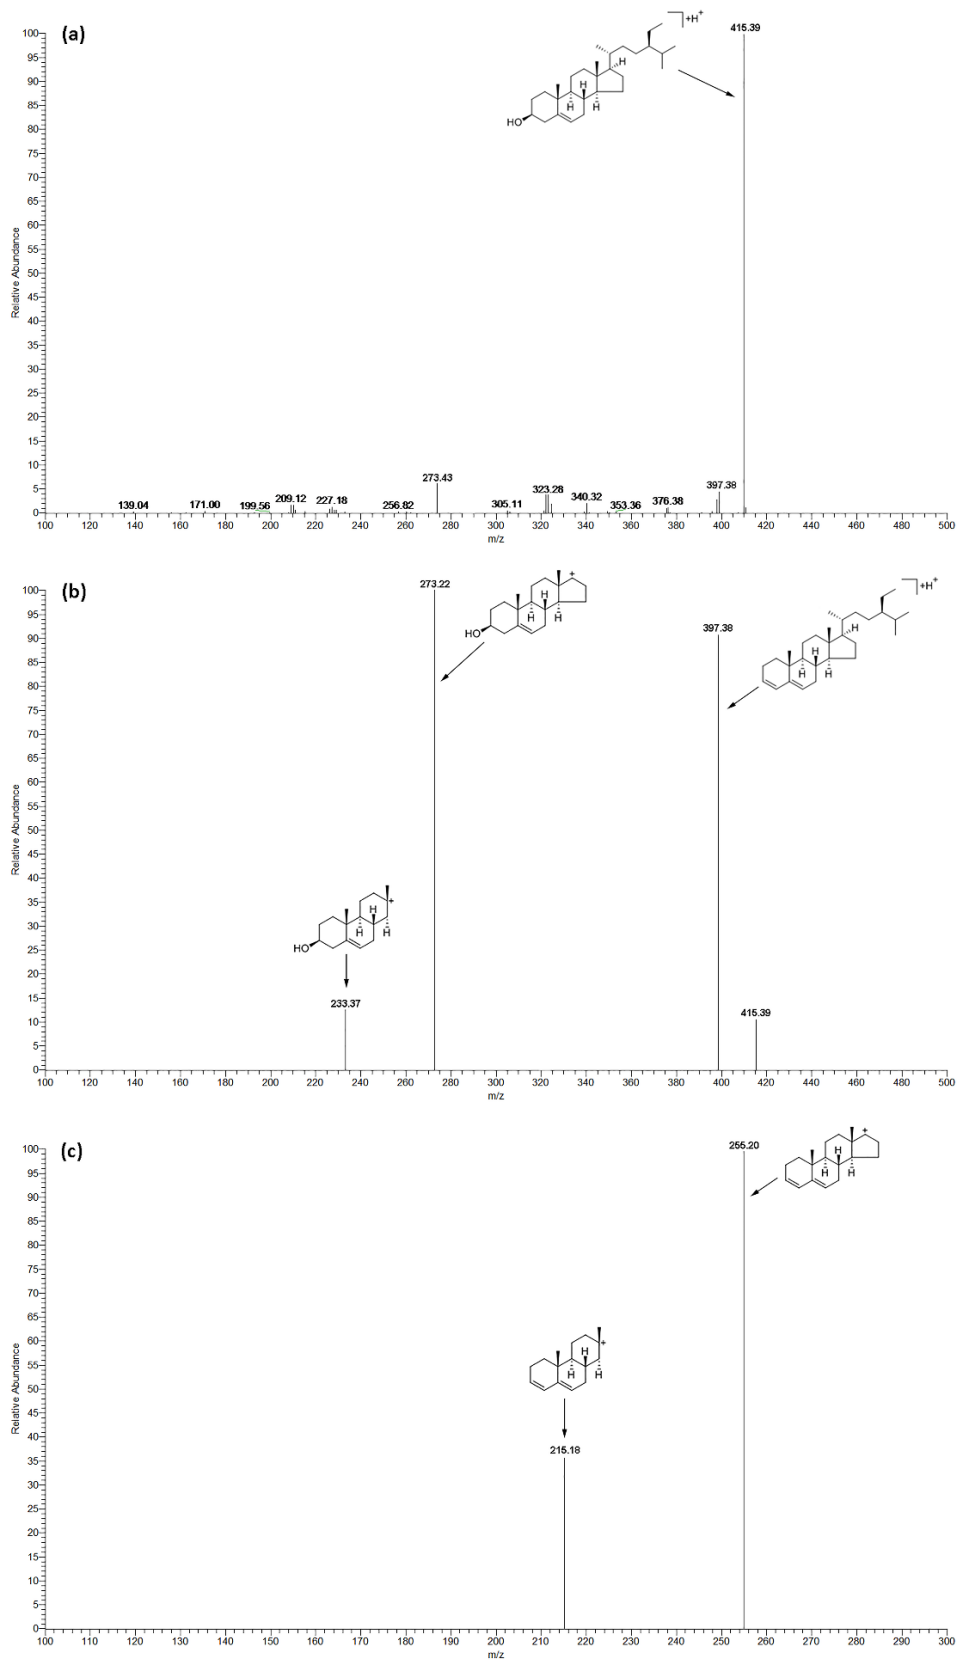

Figure S3. MS<sup>n</sup> spectra and proposed fragment ions of  $\beta$ -sitosterol (**5**) in positive ion mode: (a) MS spectrum; (b) MS<sup>2</sup> spectrum (precursor ion was m/z 415); (c) MS<sup>3</sup> spectrum (precursor ion was m/z 397).

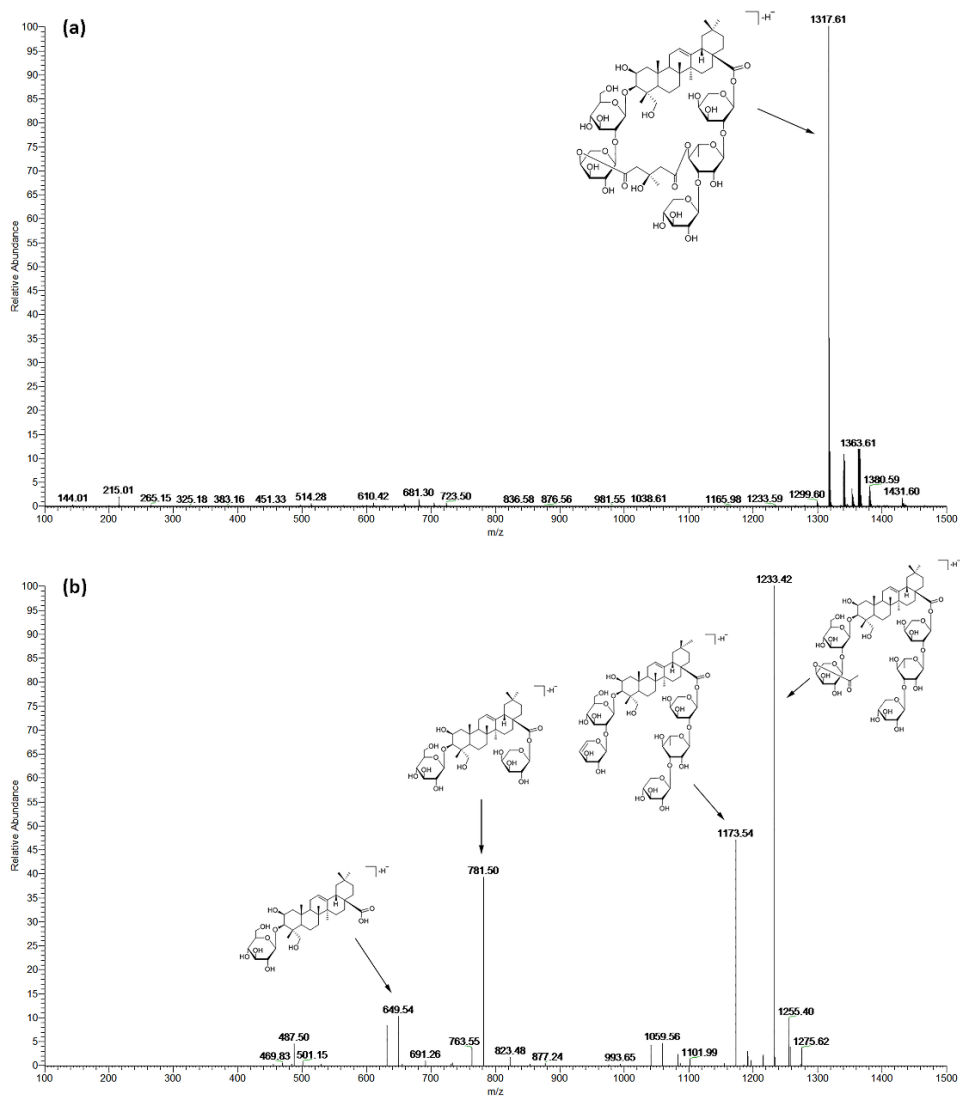

**Figure S4.** MS<sup>n</sup> spectra and proposed fragment ions of tubeimoside I (6) in negative ion mode: (a) MS spectrum; (b) MS<sup>2</sup> spectrum (precursor ion was m/z 1317).

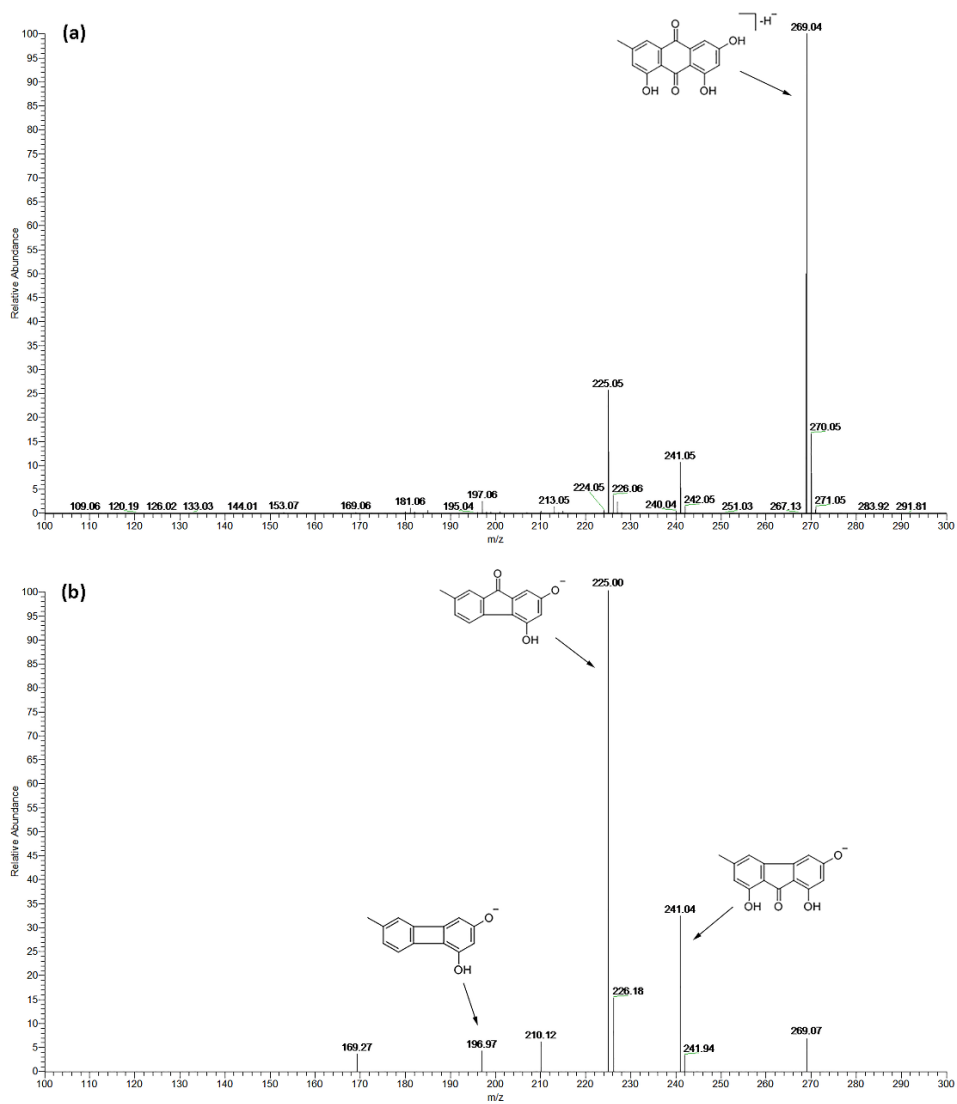

**Figure S5.** MS<sup>n</sup> spectra and proposed fragment ions of emodin (**7**) in negative ion mode: (a) MS spectrum; (b) MS<sup>2</sup> spectrum (precursor ion was m/z 269).

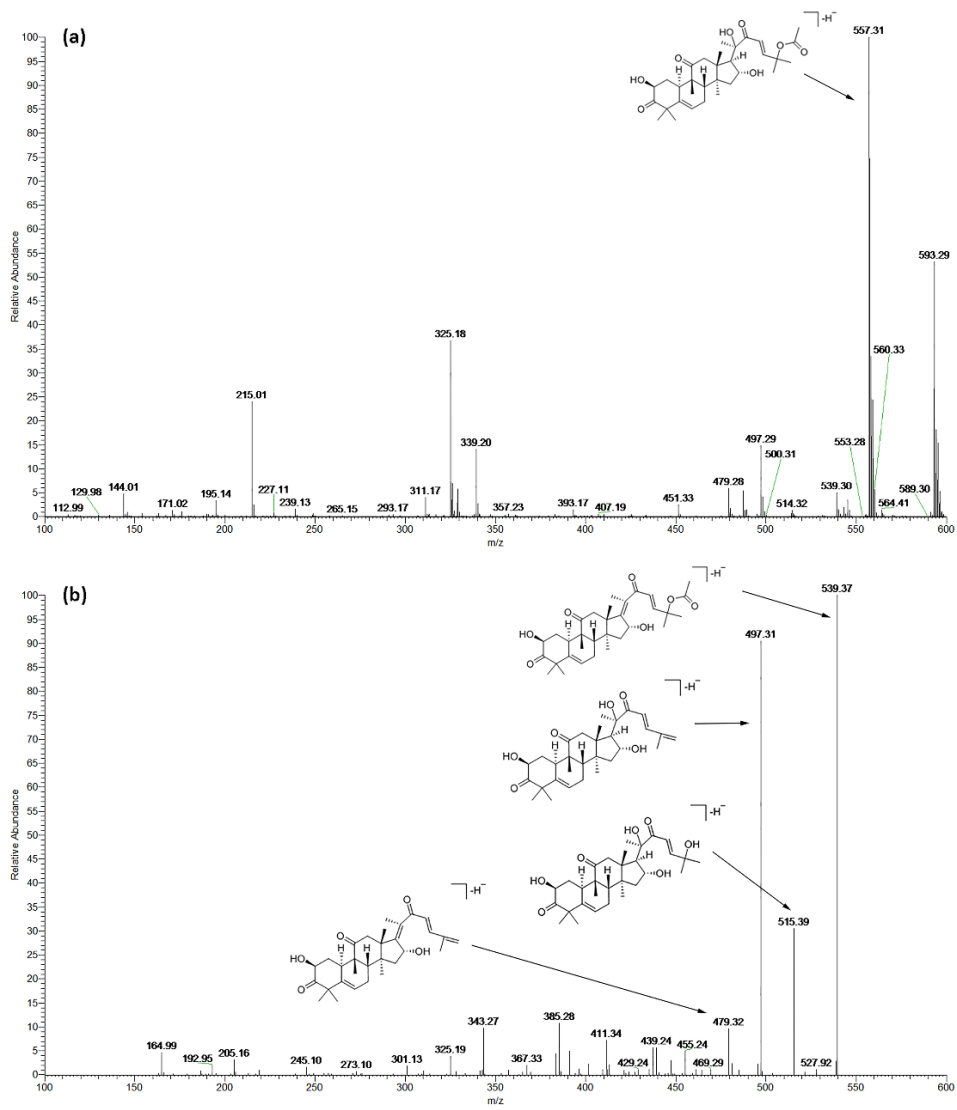

**Figure S6.** MS<sup>n</sup> spectra and proposed fragment ions of cucurbitacin B (8) in negative ion mode: (a) MS spectrum; (b) MS<sup>2</sup> spectrum (precursor ion was m/z 557).

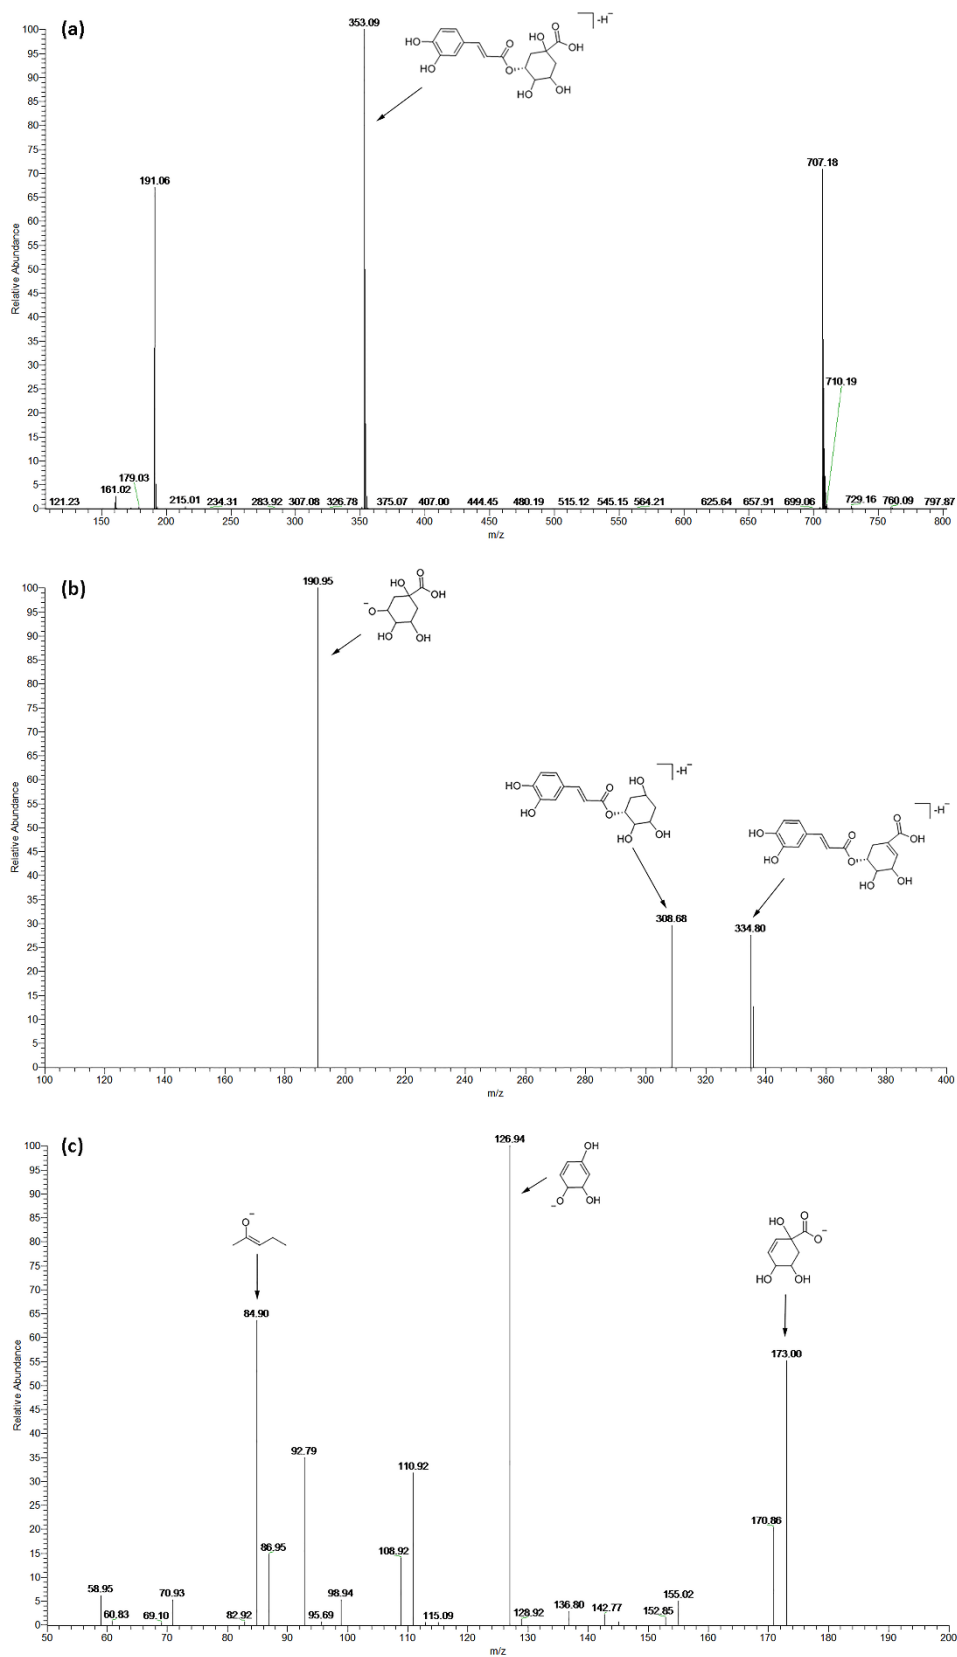

**Figure S7.** MS<sup>n</sup> spectra and proposed fragment ions of chlorogenic acid (**2**) in negative ion mode: (a) MS spectrum; (b) MS<sup>2</sup> spectrum (precursor ion was m/z 353); (c) MS<sup>3</sup> spectrum (precursor ion was m/z 191).

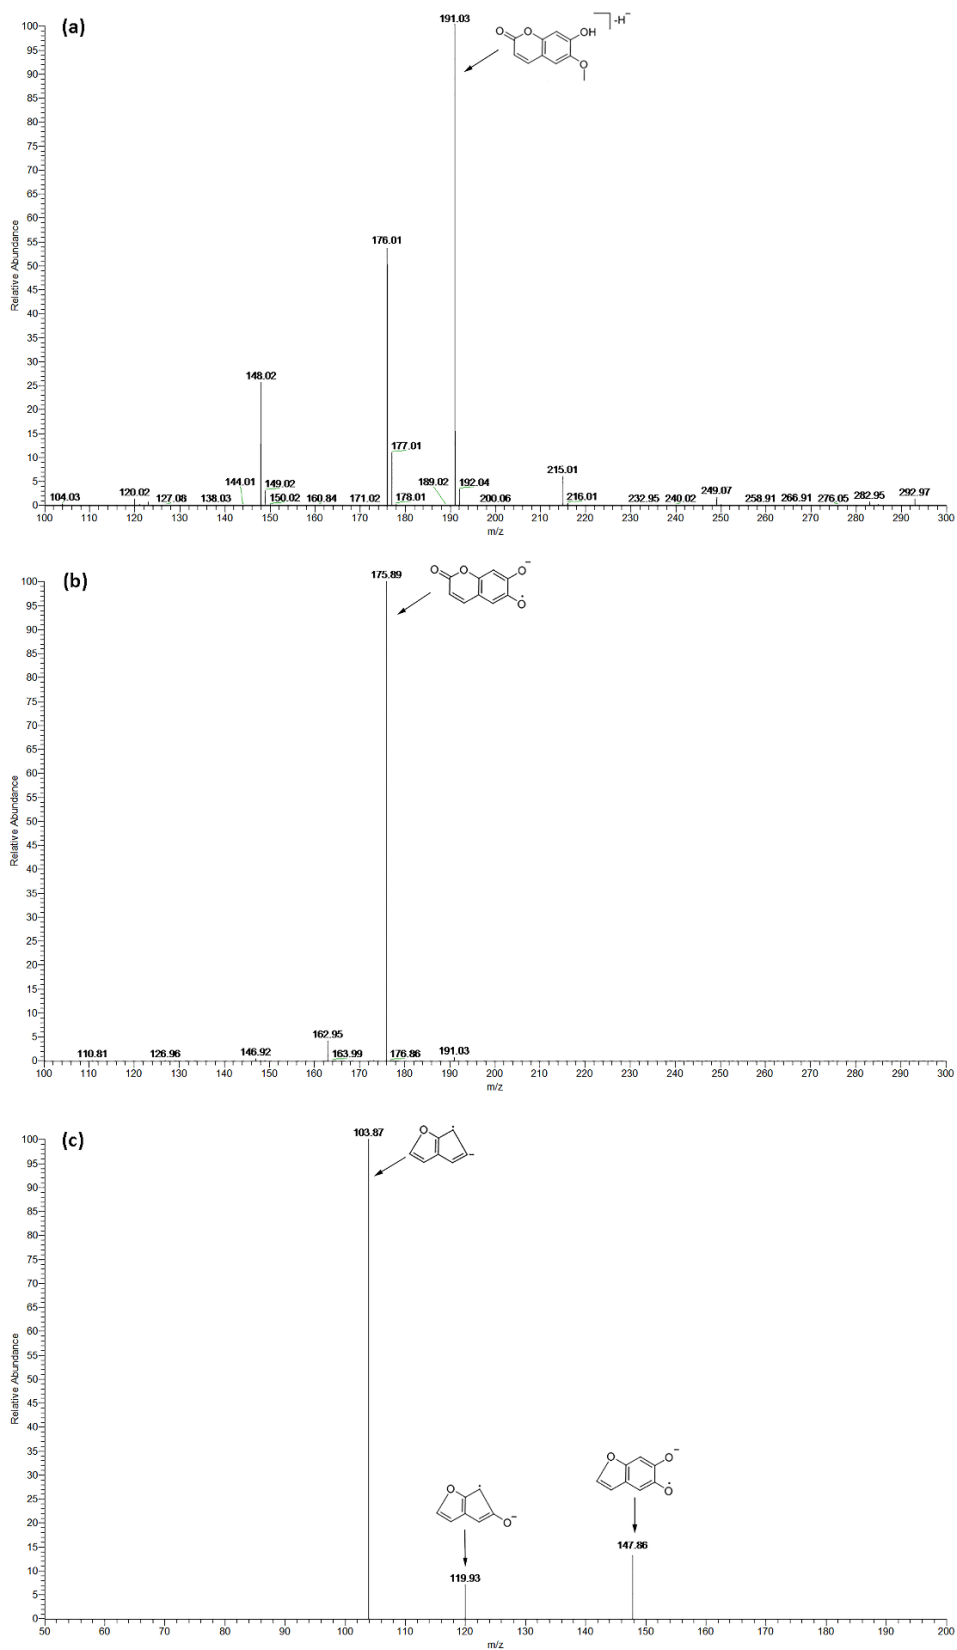

**Figure S8.** MS<sup>n</sup> spectra and proposed fragment ions of scopoletin (**4**) in negative ion mode: (a) MS spectrum; (b) MS<sup>2</sup> spectrum (precursor ion was m/z 191); (c) MS<sup>3</sup> spectrum (precursor ion was m/z 176).
